# Supplementary material for: Recyclable cross-linked hydroxythioether particles with tunable structures via robust and efficient thiol-epoxy dispersion polymerizations
Source: Royal Society of Chemistry journal article supplement (doi:10.1039/c7ra10481b), 2017-01-01
Supplement: c7ra10481b1.pdf [file c7ra10481b1.pdf]

## Supplementary information (ESI)

### Recyclable cross-linked hydroxythioether particles with tunable structures via robust and efficient thiol-epoxy dispersion polymerizations

Jiaojun Tan<sup>a</sup>, Chunmei Li<sup>a</sup>, Kevin De Bruycker<sup>b</sup>, Guoxian Zhang<sup>a</sup>, Junwei Gu<sup>a</sup>, Qiuyu Zhang<sup>a\*</sup>

**Table S1** Size, size distribution and yields of particles prepared by stoichiometric PETMP-TMTGE with different monomer concentrations

| Monomer concentration | Particle Size | CV. (%) | Yields (%) |
|-----------------------|---------------|---------|------------|
| 1.15 g                | 0.94          | 18.8    | 72%        |
| 2.30 g                | 1.31          | 25.4    | 75%        |
| 4.70 g                | 1.81          | 22.5    | 79%        |
| 6.90 g                | 2.12          | 16.8    | 82%        |
| 9.30 g                | 2.32          | 23.8%   | 85%        |
| 11.50 g               | 3.02          | 26.8%   | 89%        |

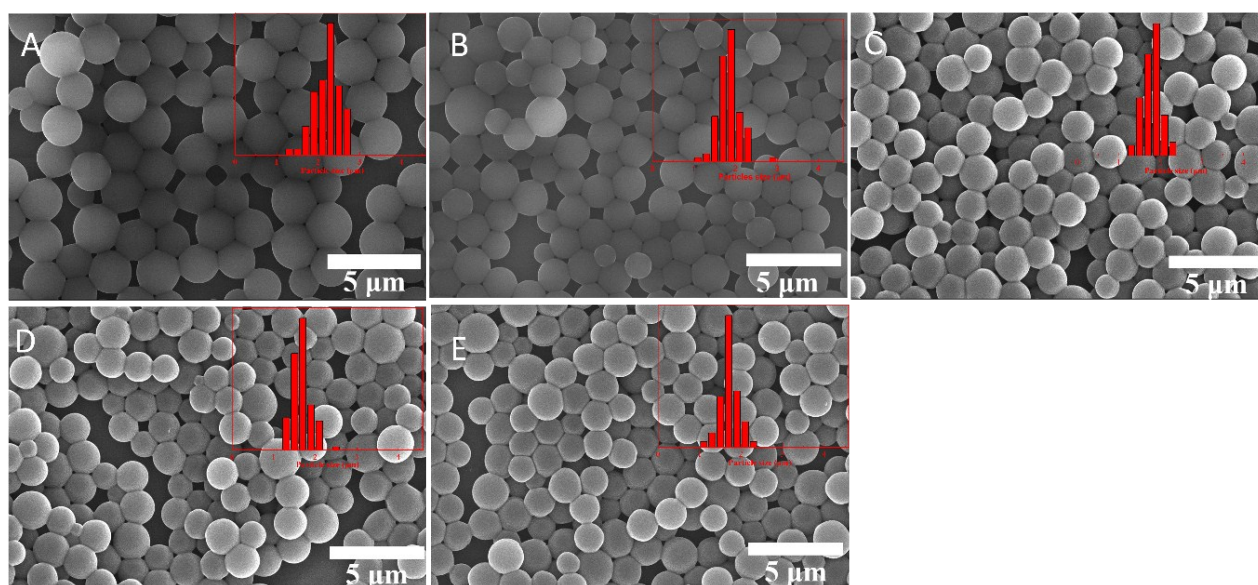

**Figure S1** SEM images of stoichiometric PETMP-TMTGE particles with different DBU concentrations: A (0.1 mL) B (0.3 mL) C (0.5 mL) D (0.7 mL) E (0.9 mL). Condition used: PETMP (2.7 g), TMTGE (2.0 g), PVP (3.0 g), 2-propanol (100 g), and the reaction lasted overnight without stirring. The size distribution was inserted. The yields of these experiments kept at ~80%.

## Supplementary information (ESI)

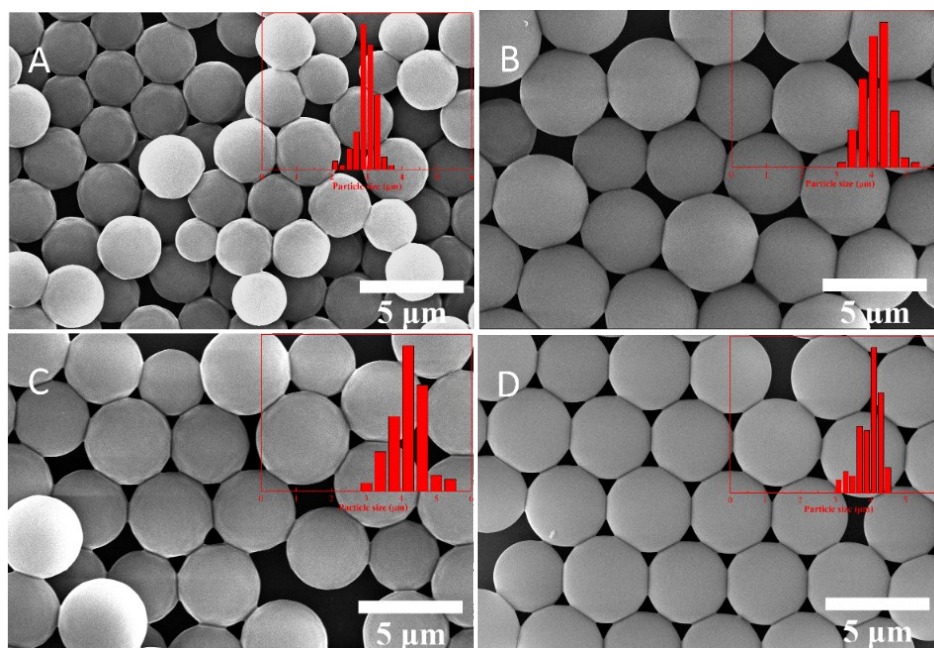

**Figure S2.** SEM images of stoichiometric TMMP-TMTGE particles with different PVP: A (1 g) B (3 g) C (5 g) D (7 g). Condition used: TMMP (3.9 g), TMTGE (3.0 g), PVP (5.0 g), 2-propanol (100 g), DBU (0.5 mL) and the reaction lasted overnight without stirring. The size distribution was inserted. The yields of these experiments kept at ~80%.

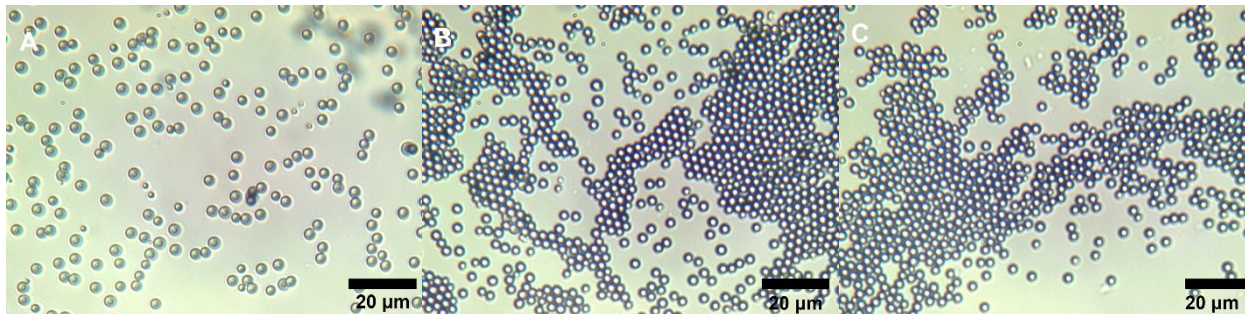

**Figure S3.** Microscope photographs of the pristine (A),  $\text{H}_2\text{O}_2$  oxidized (B), mCPBA oxidized (C) TMMP-ERL 4221 particles

## Supplementary information (ESI)

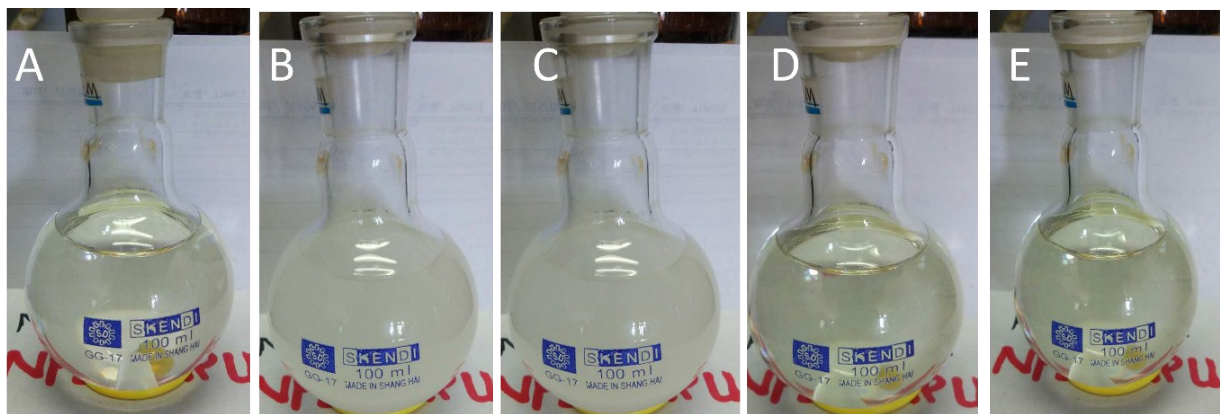

**Figure S4.** Images of TBD-catalyzed TMMP-TMTGE dispersion polymerization in ethanol with different reaction time: A (0 min), B (5 min), C (30 min), D (60 min), E (120 min). Conditions: TMMP (2.7 g), TMTGE (2.0 g), PVP (5.0 g), 2-propanol (80 g), TBD (0.4 g).

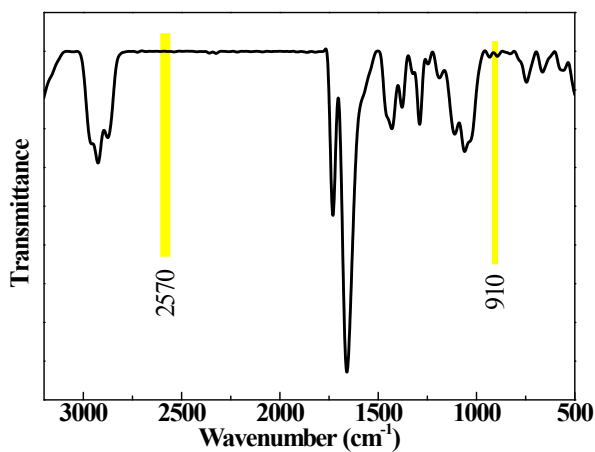

**Figure S5.** FTIR spectrum of the clear solution of TBD-catalyzed TMMP-TMTGE dispersion polymerization

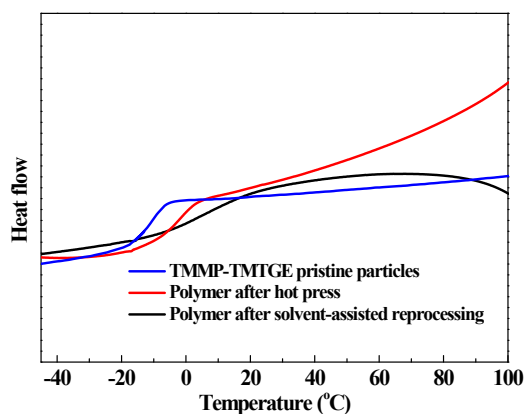

**Figure S6** DSC trace of TMMP-TMTGE particles and bulk polymer after remolding and reprocessing

## Supplementary information (ESI)

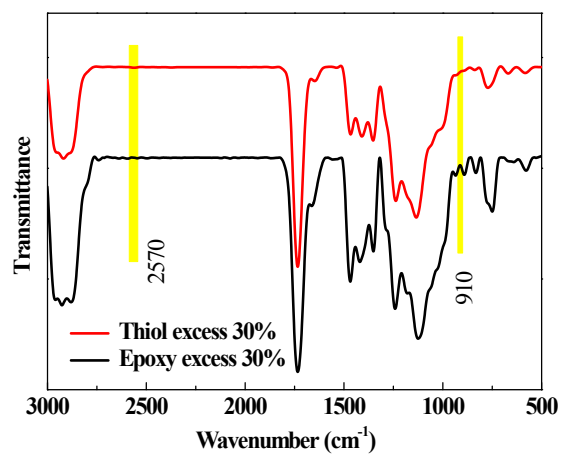

**Figure S7** FTIR spectra of thiol-excess particles and epoxy-excess particles.
